# Supplementary material
Source: PubMed Central journal article supplement (PMC3020655)
Supplement: NIHMS262545-supplement-Supplement_data.pdf [file NIHMS262545-supplement-Supplement_data.pdf]

**Supplementary Table 1. Expression of 24 imprinted genes relative to 2 control genes (control = *AU042671* and *Cry2*: these genes were chosen to represent the average gene expression of all nonimprinted genes in mouse) in 14.5-dpc female mouse conceptuses, based on quantitative real-time PCR results.**

| Gene           | Expressed Allele | Tissue |        |        |        |                |                |
|----------------|------------------|--------|--------|--------|--------|----------------|----------------|
|                |                  | Brain  | Gonads | Heart  | Liver  | Troph-ectoderm | Umbilical Cord |
| <i>Asb4</i>    | Maternal         | -0.318 | -0.480 | 0.870  | 0.298  | -1.234         | 3.496          |
| <i>Cd81</i>    | Maternal         | -3.527 | -3.402 | -2.415 | -4.925 | -4.003         | -2.699         |
| <i>Cdkn1c</i>  | Maternal         | 2.435  | 5.095  | 6.402  | 2.892  | 5.477          | 4.947          |
| <i>Dcn</i>     | Maternal         | -0.767 | 0.278  | 0.062  | -1.027 | 4.608          | 4.262          |
| <i>Gtl2</i>    | Maternal         | 1.052  | 0.643  | -0.830 | 2.356  | 2.022          | 4.893          |
| <i>H19</i>     | Maternal         | -5.961 | -1.902 | -3.683 | -3.818 | -3.681         | -0.035         |
| <i>Igf2r</i>   | Maternal         | -0.060 | 3.430  | 5.098  | 0.644  | 2.720          | 3.692          |
| <i>Mash2</i>   | Maternal         | -4.985 | 0.382  | -4.172 | -3.745 | 2.403          | -2.832         |
| <i>Osbp15</i>  | Maternal         | -0.060 | 1.530  | 0.355  | -2.473 | 1.781          | 1.340          |
| <i>Ppp1r9a</i> | Maternal         | -4.547 | -3.538 | NA     | -7.424 | -4.722         | -4.172         |
| <i>Tssc3</i>   | Maternal         | -6.330 | 0.301  | NA     | -1.600 | 1.597          | -5.685         |
| <i>Zim1</i>    | Maternal         | -0.912 | 0.215  | 1.733  | 0.127  | 2.777          | 3.858          |
| <i>Air</i>     | Paternal         | -2.412 | -0.022 | -0.058 | -0.942 | -0.470         | 1.338          |
| <i>Dio3</i>    | Paternal         | -4.620 | -3.925 | -5.592 | -8.987 | -0.177         | -4.437         |
| <i>Igf2</i>    | Paternal         | 2.642  | 3.982  | 5.877  | 3.953  | 4.687          | 7.282          |
| <i>Impact</i>  | Paternal         | -4.623 | 0.000  | NA     | -6.707 | -3.842         | -1.886         |
| <i>Nap115</i>  | Paternal         | -2.244 | -3.272 | NA     | -4.142 | -5.076         | -5.128         |
| <i>Ndn</i>     | Paternal         | 3.202  | 1.746  | 2.026  | -4.030 | -0.512         | 3.322          |
| <i>Nnat</i>    | Paternal         | 3.483  | -2.320 | -4.379 | -4.673 | -3.712         | -1.228         |
| <i>Peg1</i>    | Paternal         | 5.122  | 5.528  | 7.038  | 4.801  | 6.722          | 7.102          |
| <i>Peg10</i>   | Paternal         | -0.059 | 0.450  | -1.822 | -0.471 | 6.525          | 0.593          |
| <i>Peg3</i>    | Paternal         | 2.922  | 8.140  | 5.772  | 2.642  | 5.922          | 7.177          |
| <i>Slc38a4</i> | Paternal         | -0.763 | 2.392  | 3.699  | 2.832  | 6.948          | 3.643          |
| <i>Zac1</i>    | Paternal         | 1.906  | 1.490  | 1.652  | 1.352  | 3.393          | 5.553          |

NA, not available

Supplementary table 2 Primer sequences used for 24 imprinted genes, two control genes and housekeeping gene, *Gapdh*, used in this study.

| Primer Name | Sequence 5'---3'          |
|-------------|---------------------------|
| Peg3 F      | TGGAGACAACTGGCAAGAGG      |
| Peg3 R      | AGGGCTTGAGCGTTTCAGG       |
| Mash2 F     | CTCTCGGACCCTCTCTCAG       |
| Mash2 R     | CCAGTCAAAGGTGTGCTTCC      |
| Peg10 F     | GTCTCTACTGTGGCAATGG       |
| Peg10 R     | GGGACCTTATTCGTTCTGG       |
| Asb4 F      | GAGCTGGTTGCCCTTCTACG      |
| Asb4 R      | GCAGATGAGGTGGTGTTC        |
| Cdkn1c F    | CAGGACGAGAATCAAGAGC       |
| Cdkn1c R    | AGAAGTCGTTTCGCATTGG       |
| Gtl2 F      | GCAGCAGTGGACATGAACC       |
| Gtl2 R      | CTGGAGTGGCGAGGAAGG        |
| Igf2r F     | AGACACCAGAACCAGACACTCC    |
| Igf2r F     | GCTCTCCTCTCCCATCCTTACC    |
| Dcn-F*      | CATACTCAAATAAGGCTTCACCAA  |
| Dcn-R*      | AAAGTTGTCTGTAGTTGTGAAGTGA |
| Tssc3-F*    | TGGAGAAGCGAAGCGACAGC      |
| Tssc3-R*    | GGTGGGTTGGAAGCAGGTAA      |
| Impact-F*   | GGACTGTGAAGATGATGGAG      |
| Impact-R*   | ACACGTCTTCCCTGCCTAAC      |
| Zac1-F*     | GATCCCATGCCTCCTTTCCA      |
| Zac1-R*     | CCTTGCCATCTGCTTTGACG      |
| Air-F**     | GTGGATTCAGGTTTCATG        |
| Air-R**     | GGCCAGATATAGAATGT         |
| Peg1-F**    | TCTCCAAAAGCTCCTCAAAG      |
| Peg1-R**    | ATGAATGGGGATGGACACAG      |
| Nnat-F**    | AAGCCCTACATCTCGGTGCAGAAG  |
| Nnat-R**    | TCCCTGTCTCCAGGAGCTTACAATC |
| Ndn-F**     | AGGACTAAAAAGGTCCAGGGGCAC  |
| Ndn-R**     | CAGTCCATTCCACATGGATGCTTCC |
| Zim1-F      | ATGCTGGAGAACTACGAGAACC    |
| Zim1-R      | GACTCCTGCCTCACCTTGC       |
| Cd81 F      | GTGATGATGTTTGTAGGCTTCC    |
| Cd81 R      | GCGATCTGGTCTTTGTTTACG     |
| Dio3 F      | AGTGAAGGCGAGGAGATGC       |
| Dio3 R      | TGGGCTTGCTTGAAGAAATCC     |
| Ppp1r9a F   | ACCAGGACAAGTGAGTGAGG      |

|                |                        |
|----------------|------------------------|
| Ppp1r9a_R      | TCATCGTCGTCAGCATCATAC  |
| H19_F          | GCGAGGATGACAGGTGTGG    |
| H19_R          | GGTGGTTGAGCGGACTAGC    |
| Nap115_F       | GATGAAGATGACGAGGAAGAGG |
| Nap115_R       | TTGCTGTGCTCACTTCTTGG   |
| Osbp15-F       | GCACAGAAGGAGAACTATCG   |
| Osbp15-R       | TTCGTCCAGCTCTTCAGG     |
| Slc38a4-F      | CATGGGCAGTGGGATCTTAGG  |
| Slc38a4-R      | CCTCCTTCCTTGGCTGTCTTC  |
| <i>Gaph-F</i>  | GTCGTGGAGTCTACTGGTGTC  |
| <i>Gapdh-R</i> | GAGCCCTCCACAATGCCAAA   |
| AU042671_F     | AGGAAGGTTGCTGAGTATGG   |
| AU042671_R     | AAGGAGAAGGTGACTGTATCG  |
| Cry2_F         | AGCACTTGGAACGGAAGG     |
| Cry2_R         | CAGGCGGTAGTAGAAGAGG    |

\*: Ogawa et al., 2003

\*\* : Ogawa et al., 2006
